# Supplementary material for: Evaluating antimicrobial resistance in the global shrimp industry
Source: PubMed Central journal article supplement (PMC7319481; doi:10.1111/raq.12367), 2019-07-08
Supplement: RAQ-12-966-s001.pdf [file RAQ-12-966-s001.pdf]

**Supplementary Figure 1: Shrimp production.** Production (by quantity, in metric tonnes) of the top five farmed shrimp species since the industry began in the 1970s. Data obtained from the FAO's FishStat J Global Fishery and Aquaculture Production Statistics Dataset.

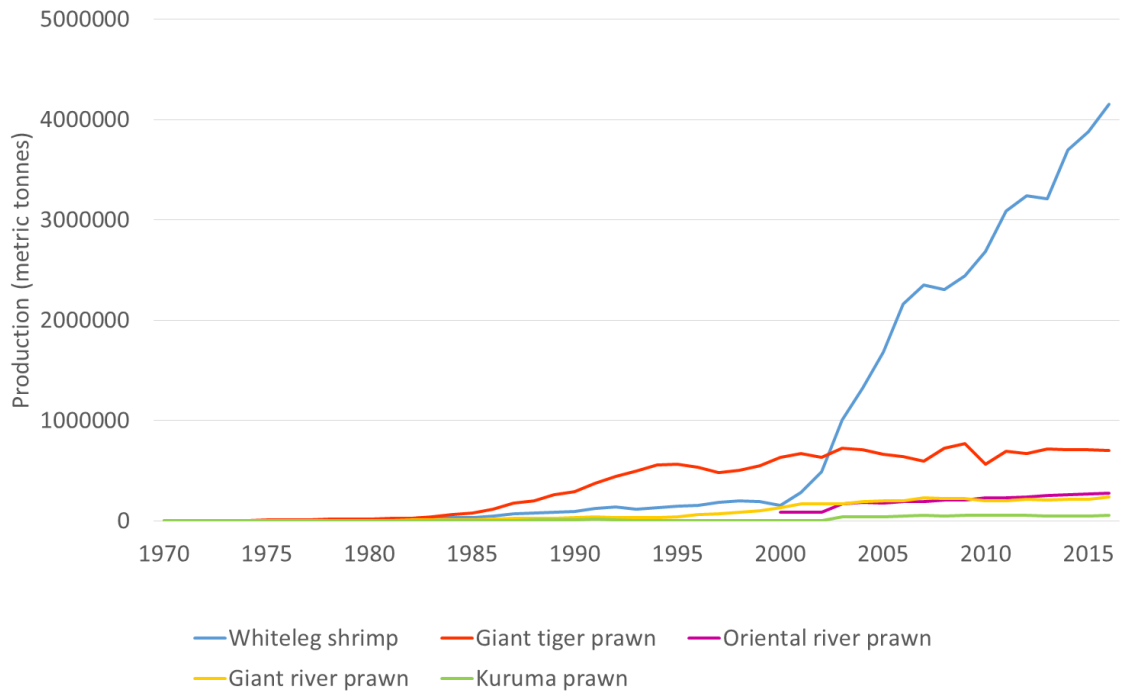

**Supplementary Figure 2: Top 10 shrimp and salmon importing and exporting countries in 2016.** Data obtained from the FAO's FishStat J Global Fishery and Aquaculture Commodity Statistics Dataset. Numbers above bars indicate percentage of total exports/imports.

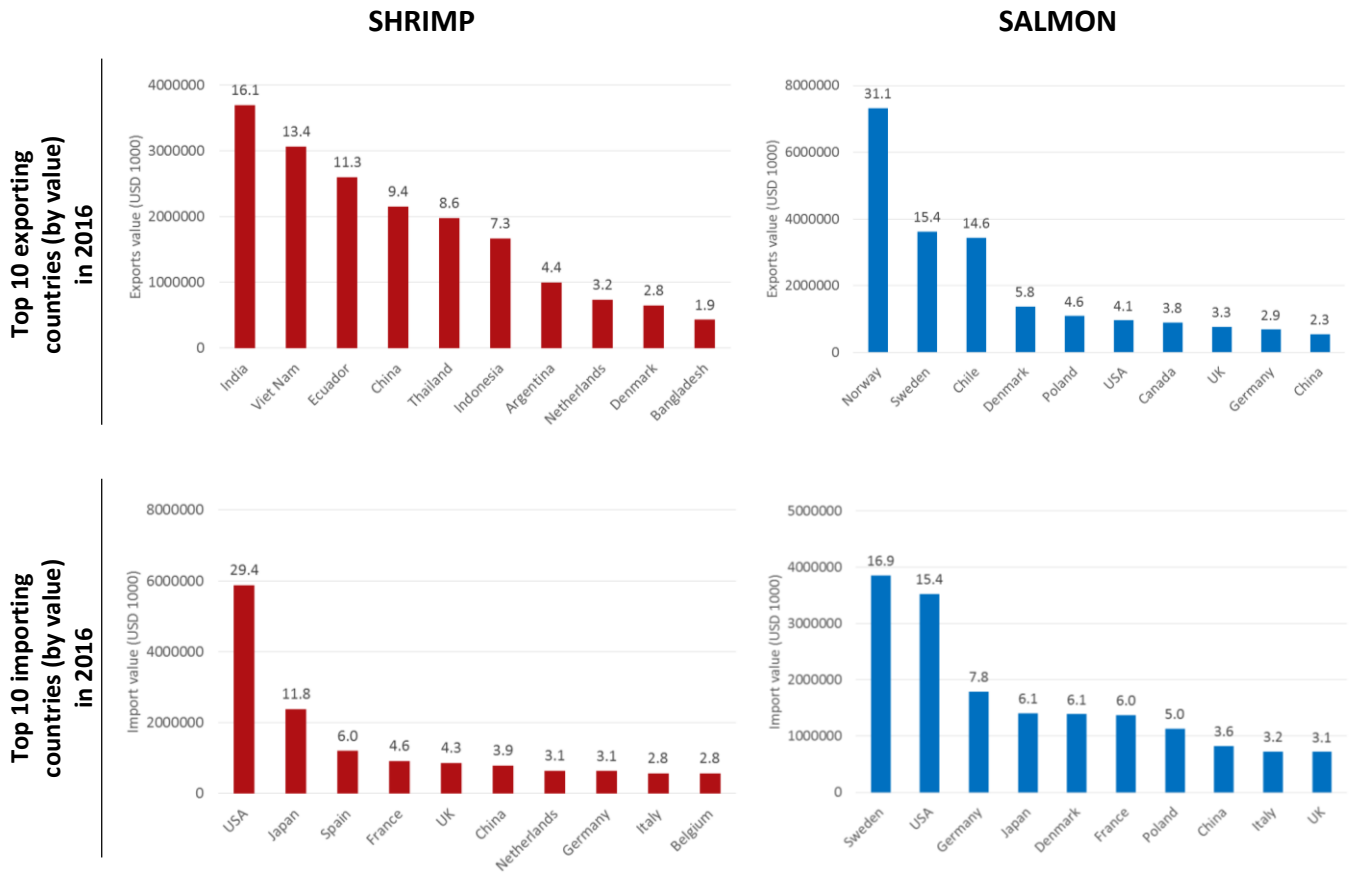

### Supplementary Figure 3: Top 10 shrimp and salmon producing countries in 2016.

Data was obtained from the FAO's FishStat J Global Fishery and Aquaculture Production Statistics Dataset. Numbers above bars indicate percentage of total production.

#### SHRIMP

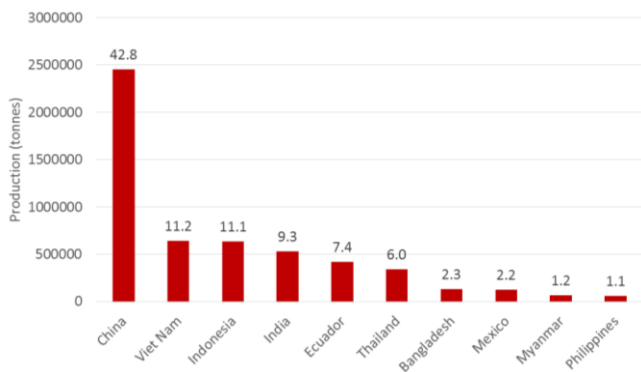

#### SALMON

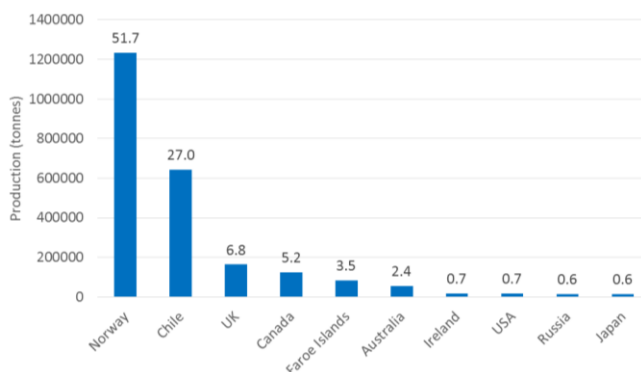

**Supplementary Table 1:** Selected data from the WHO AMR self-assessment survey (a subset of which is shown in Figure 5). Data shows country responses for the top 10 shrimp- and salmon-producing countries (year two data, 2017-18, published on 18th July 2018) for the selected topics below. Countries rate themselves from A (best practice; dark green) to E (no action being taken; red). Black indicates no response given.

|                 | Shrimp                                                                                                                                                                           |             |              |          |            |             |               |           |            |                 | Salmon                                                                                                                                                                           |          |       |           |                  |              |            |        |           |           |
|-----------------|----------------------------------------------------------------------------------------------------------------------------------------------------------------------------------|-------------|--------------|----------|------------|-------------|---------------|-----------|------------|-----------------|----------------------------------------------------------------------------------------------------------------------------------------------------------------------------------|----------|-------|-----------|------------------|--------------|------------|--------|-----------|-----------|
|                 | 1. China                                                                                                                                                                         | 2. Viet Nam | 3. Indonesia | 4. India | 5. Ecuador | 6. Thailand | 7. Bangladesh | 8. Mexico | 9. Myanmar | 10. Philippines | 1. Norway                                                                                                                                                                        | 2. Chile | 3. UK | 4. Canada | 5. Faroe Islands | 6. Australia | 7. Ireland | 8. USA | 9. Russia | 10. Japan |
| General         | 4.1. Multi-sector and One Health collaboration/coordination                                                                                                                      |             |              |          |            |             |               |           |            |                 | 4.1. Multi-sector and One Health collaboration/coordination                                                                                                                      |          |       |           |                  |              |            |        |           |           |
|                 | 5.1. Country progress with development of a national action plan on AMR                                                                                                          |             |              |          |            |             |               |           |            |                 | 5.1. Country progress with development of a national action plan on AMR                                                                                                          |          |       |           |                  |              |            |        |           |           |
| Animal health   | 6.2.1. Raising awareness and understanding of AMR risks and response in animal health (terrestrial and aquatic)                                                                  |             |              |          |            |             |               |           |            |                 | 6.2.1. Raising awareness and understanding of AMR risks and response in animal health (terrestrial and aquatic)                                                                  |          |       |           |                  |              |            |        |           |           |
|                 | 8.2.1. Good health, management and hygiene practices to reduce the use of antimicrobials in animal and plant production and AMR transmission in food production: animal health   |             |              |          |            |             |               |           |            |                 | 8.2.1. Good health, management and hygiene practices to reduce the use of antimicrobials in animal and plant production and AMR transmission in food production: animal health   |          |       |           |                  |              |            |        |           |           |
| Food production | 6.2.1. Raising awareness and understanding of AMR risks and response in food production                                                                                          |             |              |          |            |             |               |           |            |                 | 6.2.1. Raising awareness and understanding of AMR risks and response in food production                                                                                          |          |       |           |                  |              |            |        |           |           |
|                 | 8.2.1. Good health, management and hygiene practices to reduce the use of antimicrobials in animal and plant production and AMR transmission in food production: food production |             |              |          |            |             |               |           |            |                 | 8.2.1. Good health, management and hygiene practices to reduce the use of antimicrobials in animal and plant production and AMR transmission in food production: food production |          |       |           |                  |              |            |        |           |           |
| Environment     | 6.2.1. Raising awareness and understanding of AMR risks and response in environment sector                                                                                       |             |              |          |            |             |               |           |            |                 | 6.2.1. Raising awareness and understanding of AMR risks and response in environment sector                                                                                       |          |       |           |                  |              |            |        |           |           |
|                 | 8.2.1. Good health, management and hygiene practices to reduce the use of antimicrobials in animal and plant production and AMR transmission in food production: environment     |             |              |          |            |             |               |           |            |                 | 8.2.1. Good health, management and hygiene practices to reduce the use of antimicrobials in animal and plant production and AMR transmission in food production: environment     |          |       |           |                  |              |            |        |           |           |
| AMU             | 9.3. Legislation and/or regulations to prevent contamination of the environment with antimicrobials                                                                              |             |              |          |            |             |               |           |            |                 | 9.3. Legislation and/or regulations to prevent contamination of the environment with antimicrobials                                                                              |          |       |           |                  |              |            |        |           |           |
|                 | 9.2.1. Optimizing antimicrobial use in animal health (terrestrial and aquatic)                                                                                                   |             |              |          |            |             |               |           |            |                 | 9.2.1. Optimizing antimicrobial use in animal health (terrestrial and aquatic)                                                                                                   |          |       |           |                  |              |            |        |           |           |
| AMR             | 7.2. National monitoring system for antimicrobials intended to be used in animals (sales/use)                                                                                    |             |              |          |            |             |               |           |            |                 | 7.2. National monitoring system for antimicrobials intended to be used in animals (sales/use)                                                                                    |          |       |           |                  |              |            |        |           |           |
|                 | 7.5. National surveillance system for antimicrobial resistance (AMR) in animals, plants, foods and environment                                                                   |             |              |          |            |             |               |           |            |                 | 7.5. National surveillance system for antimicrobial resistance (AMR) in animals, plants, foods and environment                                                                   |          |       |           |                  |              |            |        |           |           |
| AMR             | 6.5. Training and professional education on AMR in farming sector (animal and plant), food production, food safety and the environment                                           |             |              |          |            |             |               |           |            |                 | 6.5. Training and professional education on AMR in farming sector (animal and plant), food production, food safety and the environment                                           |          |       |           |                  |              |            |        |           |           |
